# Supplementary figures and images for: Differences in Bacterial Small RNAs in Stool Samples from Hypercholesterolemic and Normocholesterolemic Subjects
Source: MDPI journal article supplement (doi:10.3390/ijms24087213), 2023-04-13

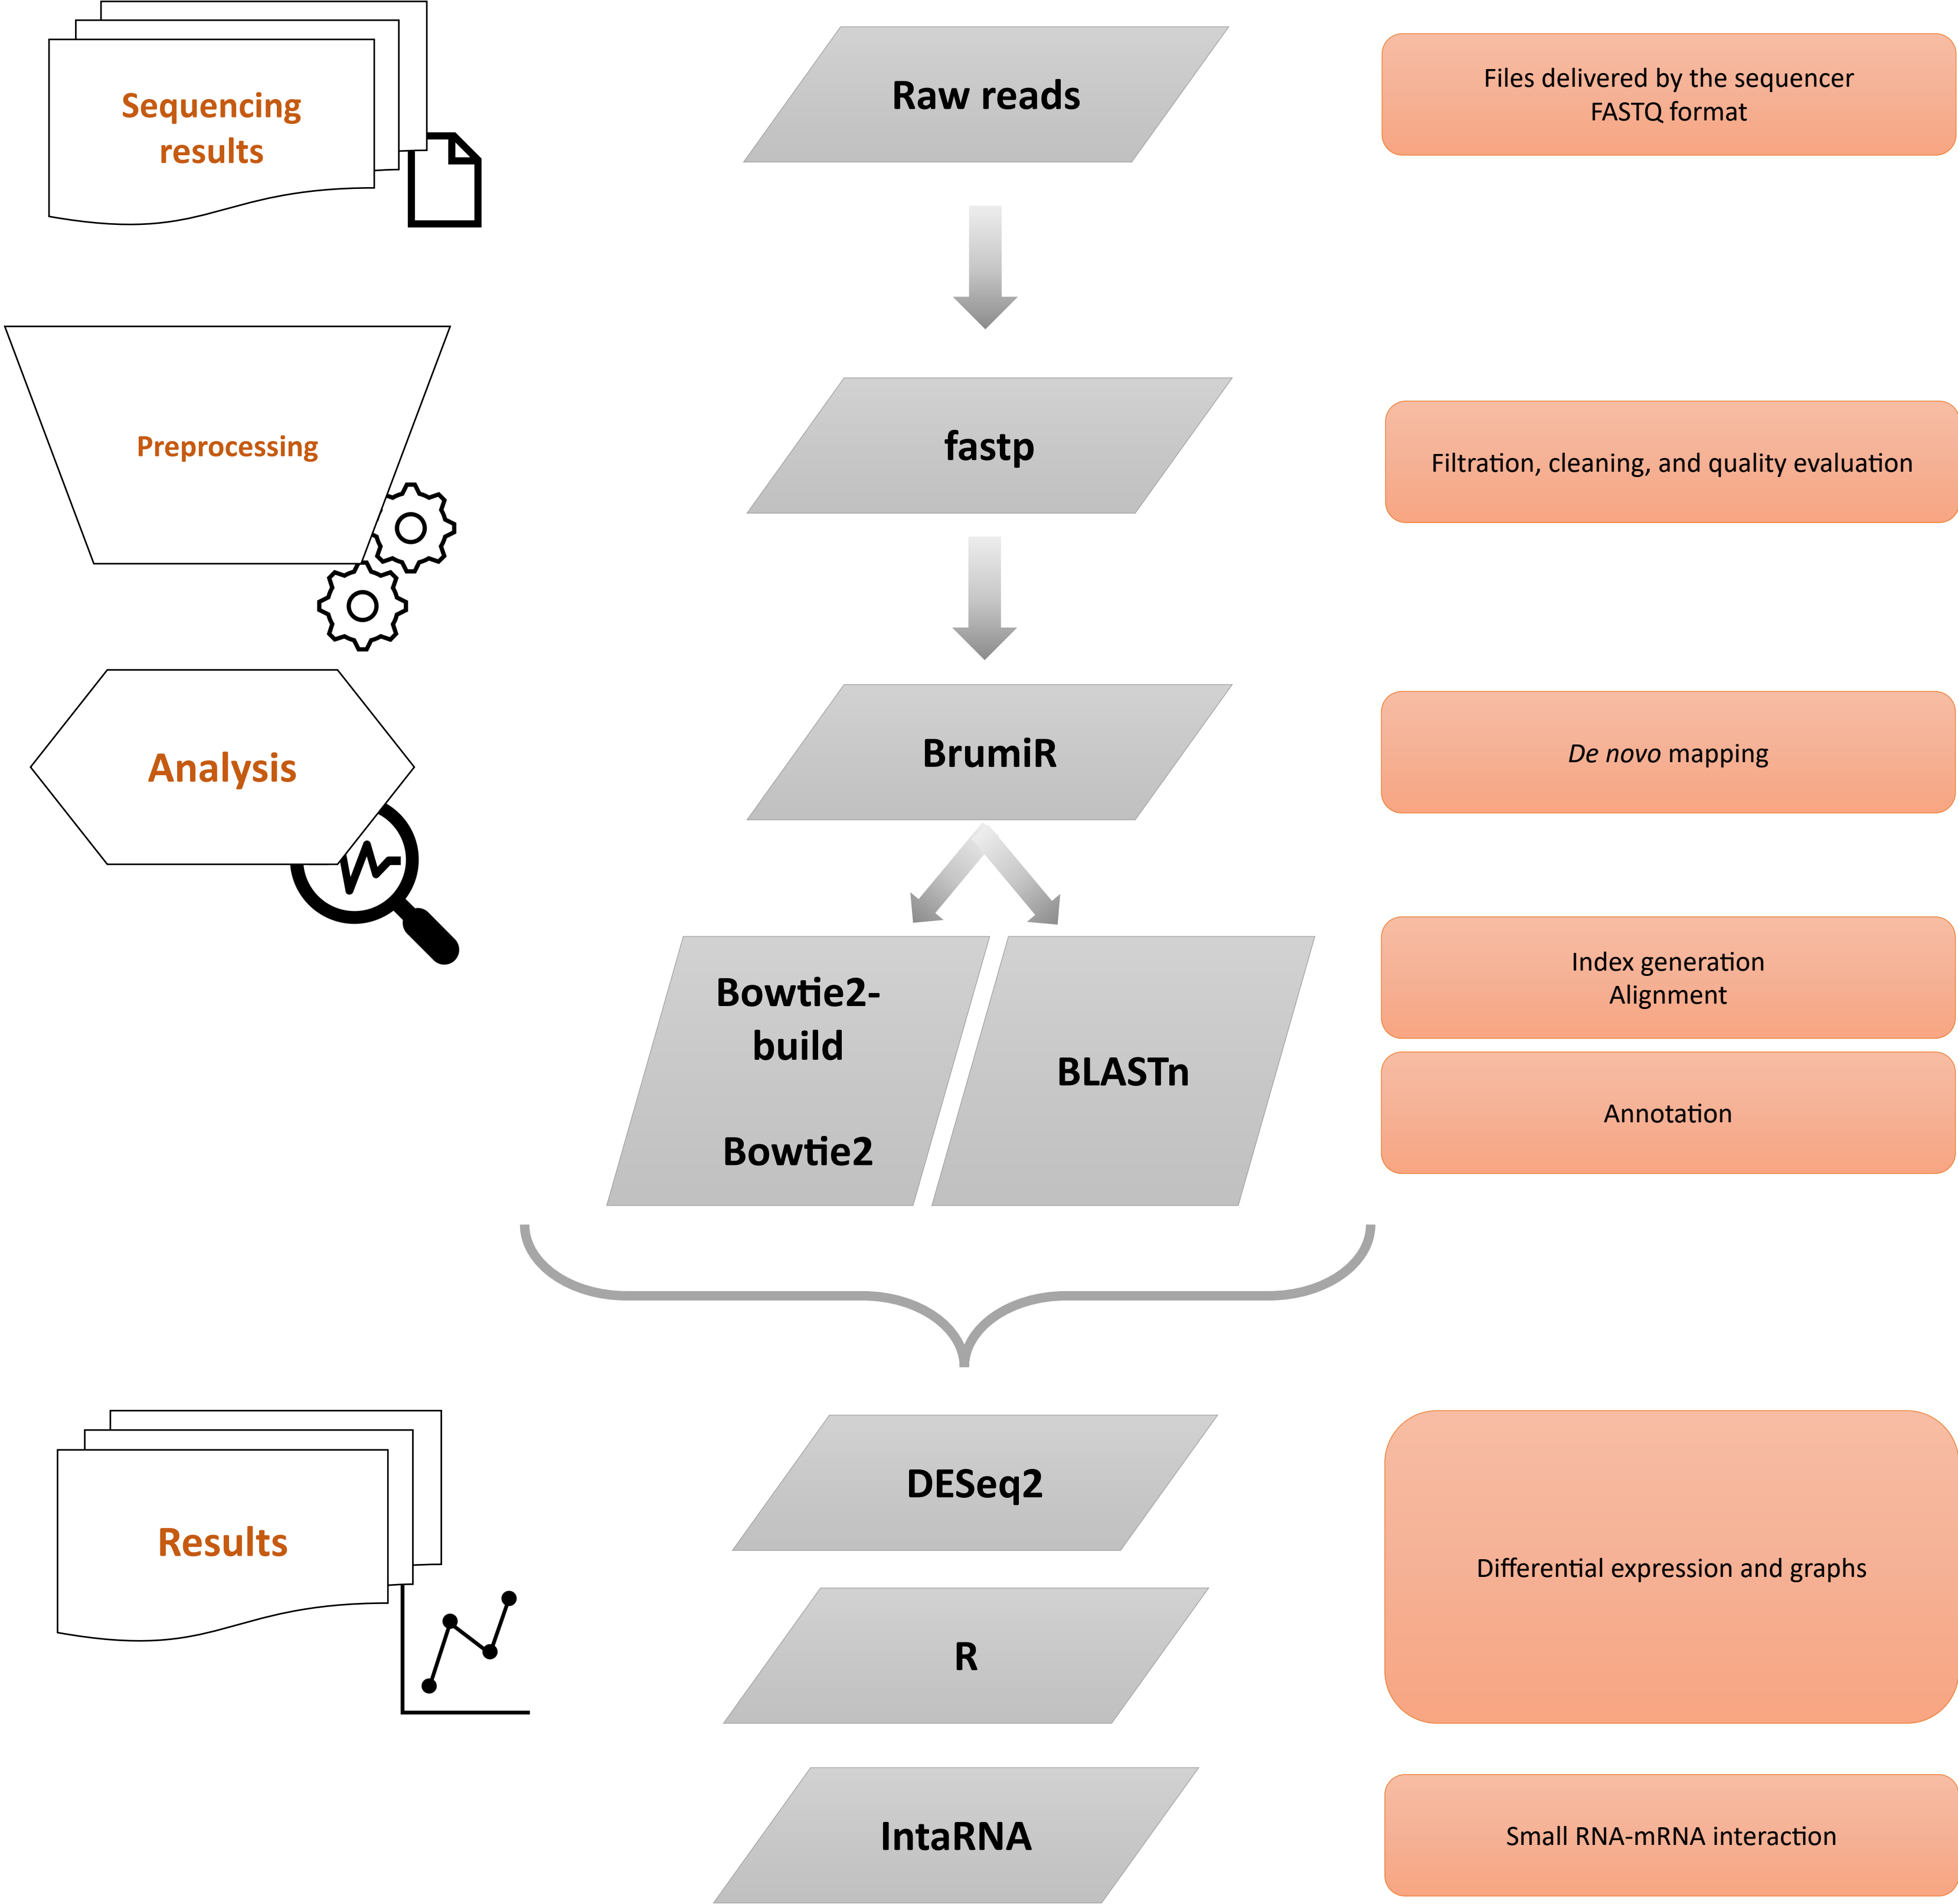

Supplement: s1 [file s1]
